# Supplementary material
Source: PubMed Central journal article supplement (PMC3641048)
Supplement: NIHMS2870-supplement-supplement_1.pdf [file NIHMS2870-supplement-supplement_1.pdf]

## Supplementary Data

**Table S1.** Number of conserved bases in the *lux* box homologues located upstream of *gtaR* and *orfg1*.

| Promoter     | <i>lux</i> box homologue location | No. of bases conserved based on <i>lux</i> box sequence proposed by Fuqua (Fuqua et al., 1994) | No. of bases conserved based <i>lux</i> box consensus sequence proposed by Horng (Horng et al., 2002) |
|--------------|-----------------------------------|------------------------------------------------------------------------------------------------|-------------------------------------------------------------------------------------------------------|
| <i>gtaR</i>  | 5'-most (in <i>rplQ</i> gene)     | 10 of 20                                                                                       | 4 of 8                                                                                                |
| <i>gtaR</i>  | 3'-most                           | 13 of 20                                                                                       | 7 of 8                                                                                                |
| <i>orfg1</i> | only one                          | 10 of 20                                                                                       | 8 of 8                                                                                                |

**Table S2.** Primers used in this study

| Primer Name | Sequence 5'-3'             | Construct(s)                 | Restriction Enzyme |
|-------------|----------------------------|------------------------------|--------------------|
| GTA5        | GATGCGGCTGCAGACCGATCC      | p601-g65                     | <i>Pst</i> I       |
| GTA2.6      | GAACCGGATCCATCGCCAGGG      | p601-g65                     | <i>Bam</i> HI      |
| LHR2.2      | GTGATCTGTCCGATCCTCGGGATAGG | p601-P2R, p601-P25, p601-P23 | <i>Bam</i> HI      |
| LHR2        | ACACTTGTTGGGATCCGTGTGTATG  | p601-P1R                     | <i>Bam</i> HI      |
| KOR1F       | CGATGAAGGTCGACACTGACGGTT   | p601-P2R, p601-              | <i>Pst</i> I       |

|                        |                                     |                                 |                               |
|------------------------|-------------------------------------|---------------------------------|-------------------------------|
|                        |                                     | P1R                             |                               |
| LHR5                   | AGACCACCCTGCAGAAAGCCA               | p601-P25                        | <i>Pst</i> I                  |
| LHR3                   | TTTCGAAGCTGCAGACGAATAAGC            | p601-P23                        | <i>Pst</i> I                  |
| PR28n                  | CTGTCTAAAAACATATGTCCATACACAC        | pET28R                          | <i>Nde</i> I                  |
| PR28c                  | CGCTGCGGGATCCTACAG                  | pET28R                          | <i>Bam</i> HI                 |
| gtaR_comp_up           | GTATCGGTACCAGCAAACGACCTTAGGA        | pIND4R                          | <i>Kpn</i> I                  |
| gtaR_comp_down         | GTACAGGATCCGAAAGTGTGGTGGTCTGC<br>AT | pIND4R                          | <i>Bam</i> HI                 |
| <b>Primer Name</b>     | <b>Sequence 5'-3'</b>               | <b>Intergenic<br/>Region</b>    | <b>Restriction<br/>Enzyme</b> |
| rplQ-gtaR_up           | CGACGTTTCGGCGAAGGGCG                | <i>rplq-gtaR</i>                | n/a                           |
| rplQ-gtaR_down         | CCGCAGACACTTGTTGAT                  | <i>rplq-gtaR</i>                | n/a                           |
| gtaR-gtaI_up           | GCTGCGAAGCTTGGCATCA                 | <i>gtaR-gtaI</i>                | n/a                           |
| gtaR-gtaI_down         | AATGATGAACTTTGCCGCC                 | <i>gtaR-gtaI</i>                | n/a                           |
| gtaI-rcc00330_up       | GCTGGTATCGCCGCTGC                   | <i>gtaI-rcc00330</i>            | n/a                           |
| gtaI-<br>rcc00330_down | CCTCGGACAGATGCTGCG                  | <i>gtaI-rcc00330</i>            | n/a                           |
| <b>Primer Name</b>     | <b>Sequence 5'-3'</b>               | <b>EMSA<br/>Fragment(s)</b>     | <b>Restriction<br/>Enzyme</b> |
| LHR2.2                 | GTGATCTGTTCGGATCCTCGGGATAGG         | DR9, DR7, DR5,<br>DR3, DR1, P23 | <i>Bam</i> HI                 |
| LHR3                   | TTTCGAAGCTGCAGACGAATAAGC            | P23, DRR                        | <i>Pst</i> I                  |

|                  |                              |                    |              |
|------------------|------------------------------|--------------------|--------------|
| LHR3             | TTTCGAAGCTGCAGACGAATAAGC     | 345 bp             | <i>Pst</i> I |
| KOR1F            | CGATGAAGGTCGACACTGACGGTT     | 800 bp             | <i>Pst</i> I |
| LF9              | AGGCAATTCCCGGTTGATCTT        | DR9                | n/a          |
| LF7              | TGGCACCTGTCTAAAAAGACATGTCCA  | DR7                | n/a          |
| LF5              | GTCTAAAAAGACATGTCCATACACACCG | DR5                | n/a          |
| LF3              | ACATGTCCATACACACCGAAATCAA    | DR3                | n/a          |
| LF1              | CCGAAATCAACAAGTGTCTGCG       | DR1                | n/a          |
| LHRrf            | GAAAAGATCAACCGGGAATTG        | DRR                | n/a          |
| 3RPL             | GCTTATTCGTCTGCAGCTTCGAAA     | R23                | n/a          |
| M200R            | GCGCAACGCATTTAATG            | M1                 | n/a          |
| Lux-upstream-F   | AGACCCATGCGTCACG             | <i>gtaR</i> 681 bp | n/a          |
| Lux-downstream-R | CCGATGAAATAGCCATCC           | <i>gtaR</i> 681 bp | n/a          |

### Supplementary material figure legends.

Figure S1. The *gtaR* gene, surrounding orfs, and the sequence of the *ctrA* 5' regulatory region. **A**, Representation of *gtaR* and flanking genes. Annotations are according to Genbank accession # CP001312. From left to right: *rpoA* is annotated as a DNA-directed RNA polymerase subunit alpha; *rplQ* is annotated as the 50S ribosomal protein L17; *gtaR* encodes the GtaR response regulator; *gtaI* encodes a homoserine lactone synthase; and rcc00327 is a predicted protein of unknown function. **B**, DNA sequence of the *gtaR* 5' region, showing key features. Bent arrows

show the *rplQ* and *gtaR* start codons. Green boxes indicate the –35 and –10 sites predicted by the Softberry program BPRM (<http://linux1.softberry.com/berry.phtml>). Red boxes are the stop codons for *rpoA* and *rplQ*. The black horizontal bars indicate predicted *lux* boxes. An alternative predicted *gtaR* start codon is indicated by a yellow box. The vertical arrow labeled “2.2” indicates the 3’ juncture of all *gtaR::lacZ* fusions except p601-P1R, which has a 3’ juncture indicated by the vertical arrow labeled “2.1”. The vertical arrows labeled with odd numbers and “R” indicate the 5’ end of *gtaR* promoter region deletions. Each arrow is identified with a label that corresponds to the plasmid name (*i.e.*, the arrow labeled “5” corresponds to plasmid p601-P25). Numbers on the right indicate the number of bases before or after the *ctrA* start codon.

Figure S2. The GtaR-6xHis protein does not bind to the RcGTA promoter region. **A**, Representation of RcGTA *orfg1* and 5’ sequences. The black boxes represent predicted -10 and -35 sites and the empty box is a predicted *lux* box. The bracket indicates the 650 bp DNA fragment used for EMSAs. **B**, EMSA using the GtaR-6xHis protein and the 650 bp DNA fragment. O indicates the origin of eletrophoresis.

Figure S3. Comparison of RcGTA gene expression in the *R. capsulatus gtaRI* mutant in the absence and presence of exogenous acyl-HSLs. **A**, western blots of cells probed with RcGTA capsid protein antiserum; **B**, frequency of RcGTA-mediated gene transfer of *gtaRI* knockout (*ΔgtaRI*) with no addition of acyl-HSL and the addition of C12-, C16- and C18-HSL (C12, C16 and C18). Error bars represent the standard deviation of the mean between samples (n=3), except that \* indicates the range between samples (n=2).

Figure S4. An unrooted phylogenetic tree of LuxR homologs in gram-negative bacteria. The branch containing GtaR is encircled with a dashed line, and GtaR is marked with two asterisks. The two additional *R. capsulatus* ORFs with homology to LuxR-type transcriptional regulators are marked with a single asterisk. Members of the previously identified EsaR clade are enclosed within a solid line. Names of  $\alpha$ -proteobacteria are in green,  $\beta$ -proteobacteria in blue, and  $\gamma$ -proteobacteria in red. Support values were based on 1000 replicates and the scale bar represents the number of substitutions per site.

A

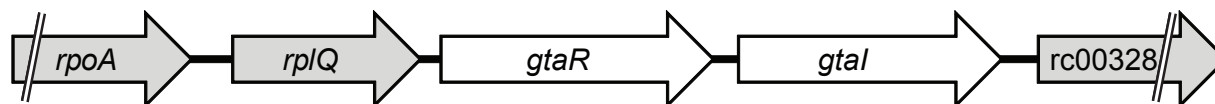

B

CGGAATCGGC CTCGAAGACC GATGCCGACG ACGGGCTCGA GTTCAACCCG CTGCTGCTGA -900  
 AGAAAGTGGA CGAGCTGGAA CTGTTCGGTCC ..(N190).. TCTGGCCAAG CGCTTCGAAG -840  
 ACCAGTTC **TG A**AAACGTCCG GGGGGTGGGT GACCGCCCC CGAAAATGCC CGGACTTCCG -780  
 GGAACCCCTG GGCATGATGC CCCAACGAAG CCCCCGCAC GCACGGGGCG CAACACAAAG -720  
 CAAAACGACC TTAGGAGAGA CCC**ATG**CGTC ACGCCCGCGG CTACCGCCGT CTGAACCGTA -660  
 CCCACGAACA CCGCAAGGCG CTGTTCGCCA ACATGTGCGG CTCGCTCATC GAACACGAAC -600  
 AGATCAAGAC CACCCTGCCG AAAGCCAAG AACTGCGTCC GATCATCGAA AAGCTGATCA -540  
 CGCTGGCCAA GCGCGGCGAC CTGCATGCC GTTGT CAGGC GCGGCGATG C**TTGAAG**CAG -480  
 GACAAGGACG T**GGCCAAGCT** TTTTCGACGTG CTCGGGCCCC GCTACAAGGA CCGTCAGGGC -420  
 GGCTACACCC GCGTCCTGAA AGCCGGTTTC CGCTATGGCG ACATGGCGCC GATGGCCTTC -360  
 ATCGAATTCG TCGAGCGCGA CGTTTTCGGCG AAGGGCGCGG CTGACAAGGC CCGTGAAGCG -300  
 GCTTTCGAAG CGGCCGACGA A**TAA**GCTTTC CGCAAGGGAA GCCGGAAGCC CGCCCCTCGG -240  
 GGCGGGTTTT CGTTTT**TTGCG** GCGGCGCAA CCGCAG**GGCG** **AGACT**TGGCG GCAATCTGCC -180  
 CGTAATGGCG CCGATTTTCAG CAAAACCAC CCCGCCGAG GCAATTCCCG G**TTGATC**TTT -120  
 TCCGGTGGCA CCT**GTCTAAA** AAGAC**ATG**TC CATAACACC GAAATCAACA AGTGTCTGCG -60  
 GGAAATCGGT CGGTCGCGA CGGATGGCTA TTTTCATCGGC CTGCATATCC GTTTCGCCGC -10  
 CCCGATC**ATG** CAATTCCAGA CCTATCCCGA GCGGTGGACA GATCACTACA CCCGGCAGGC 50

Annotations:  
 - **rpoA**: red box around TG A at position -780.  
 - **rplQ**: arrow pointing to ATG at position -660.  
 - **gtaR**: arrow pointing to ATG at position 50.  
 - **R**: arrow pointing to CTGCTGCTGA at position -900.  
 - **5**: arrow pointing to CACCCTGCCG at position -540.  
 - **-10**: arrow pointing to CTGCATGCC at position -480.  
 - **-35**: arrow pointing to TTTGCG at position -180.  
 - **-10**: arrow pointing to GTCTAAA at position -60.  
 - **-35**: arrow pointing to TTGATC at position -120.  
 - **2.1**: arrow pointing to TTTTCATCGGC at position -10.  
 - **2.2**: arrow pointing to GCGGTGGACA at position 50.

Fig S1

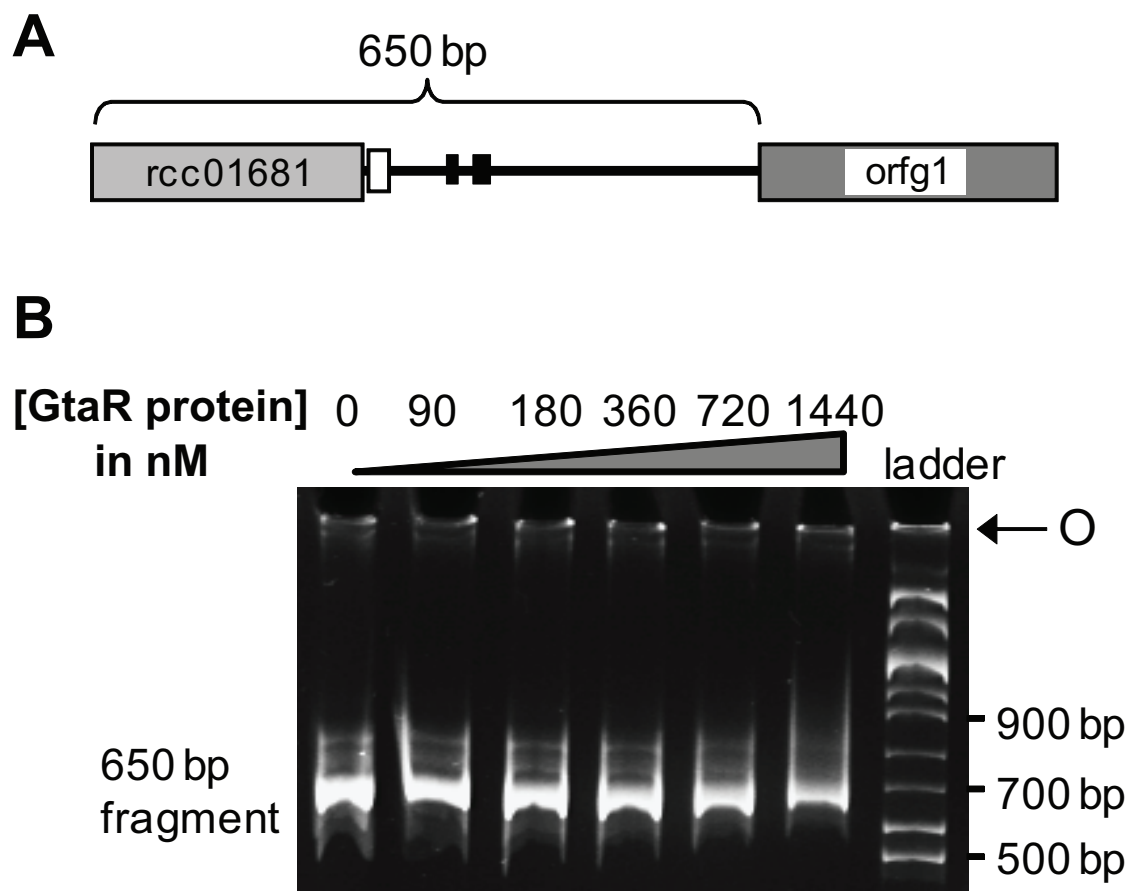

Fig S2

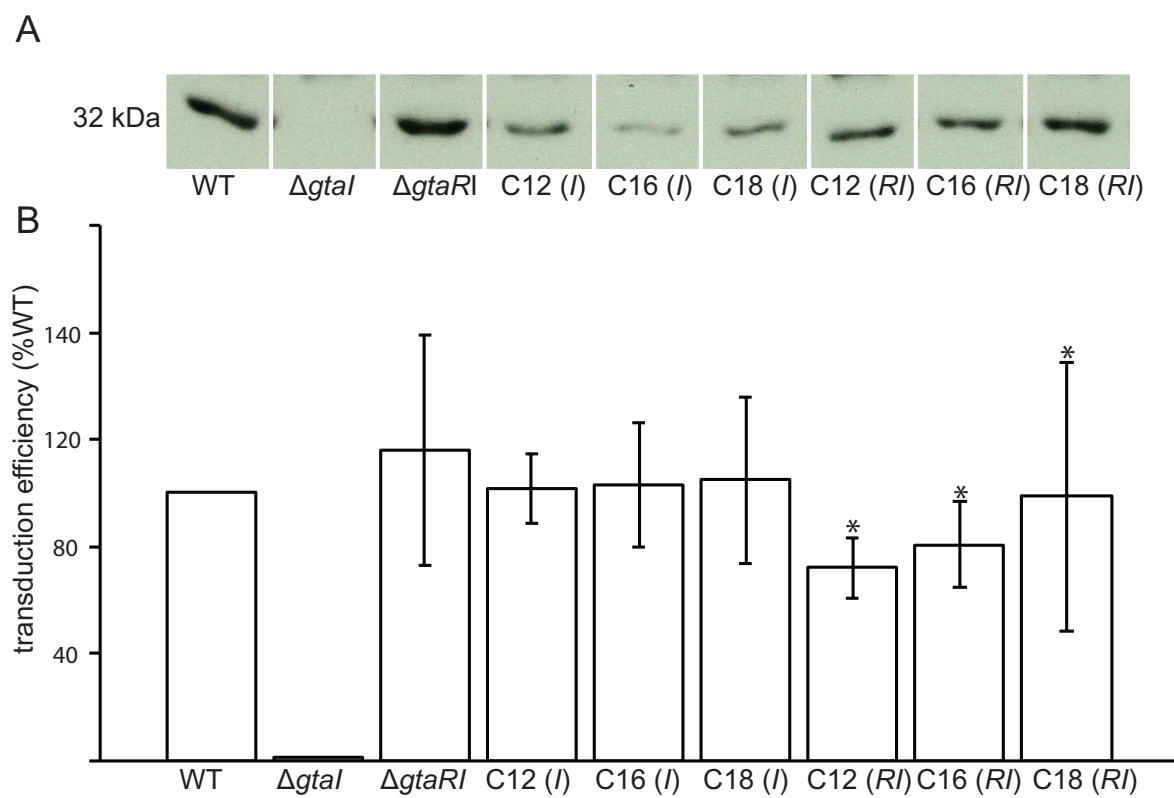

Fig S3



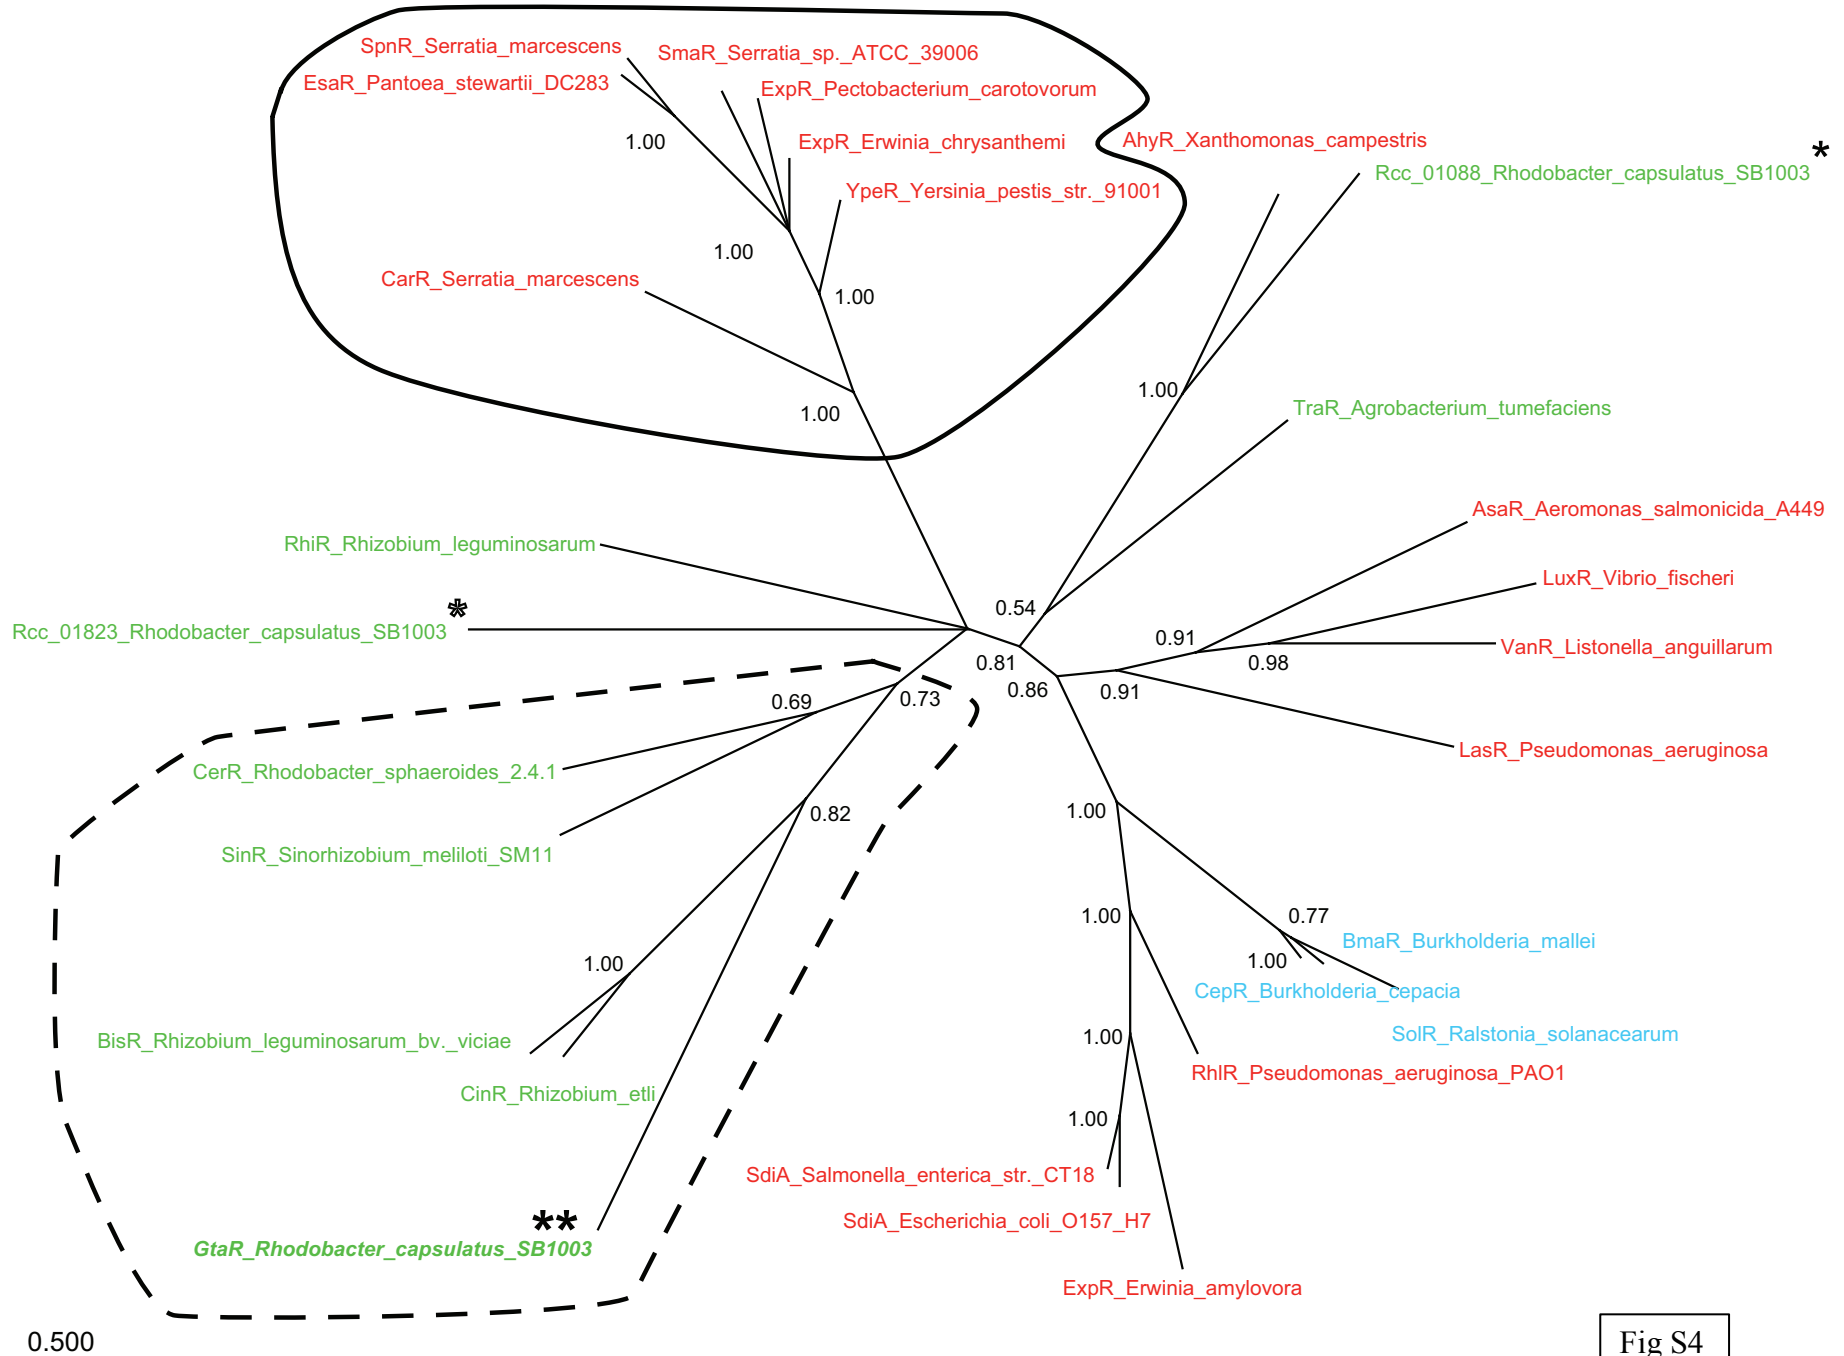

Fig S4
